# Supplementary material for: Aerosol uncertainties in tropical precipitation changes for the mid-Pliocene Warm Period
Source: Copernicus journal article supplement (doi:10.5194/egusphere-2023-2702), 2023-11-28
Supplement: Supplementary file [file egusphere-2023-2702-AC3-supplement.pdf]

# Reply to Referee 2's comments on egusphere-2023-2702

A. Zhao *et al.*

**Correspondence:** annizhao@pku.edu.cn

Comments on "Aerosol uncertainties in tropical precipitation changes for the mid-Pliocene Warm Period"

In this study the authors analysed the climate uncertainties resulted from aerosol scenarios in the simulations of mid-Pliocene Warm Period. Three simulation experiments PI, Plio\_Pristine, and Plio\_Polluted were analysed, which represent pre-industrial, mid-Pliocene with pre-industrial emissions, and mid-Pliocene with pre-industrial emissions plus industrial pollutants. They found that the change of precipitation between Plio\_Pristine and Plio\_Polluted is generally larger than that between Plio\_Pristine and PI. And they concluded that the aerosol forcing was the dominant driver in tropical precipitation change during mid-Pliocene.

This work seems to be a continuation of the work in Feng et al. (2019) with further analysis of the model results. In my opinion, there are some novel findings but not enough and explicit under current analysis. The details of some results and discussion are missing. And the conclusion is too strong. So I suggest the authors to make a major revision.

The general comments and specific comments are listed below:

**We would like to thank the reviewer for commenting our manuscript. We are happy to adopt many of the comments and will revise the manuscript as requested.**

15 General comments

1. Please reduce the number of colors used in the colorbars in the figures, it is difficult to relate the colors with the value ranges.

**Figures will be replotted.**

20 2. With the model experiments designed or shown in this study, it is reasonable to study the aerosol uncertainties with two idealised aerosol scenarios. However, the conclusion (aerosol forcing is the dominant driver in tropical precipitation change in mid-Pliocene) can not be derived following this work. First, in the PlioMIPs, the emissions of aerosols and their precursors were designed to be following the pre-industrial configuration (Haywood et al., 2011), so adding the industrial pollutants is an idealised experiment and not based on proxy data or derived mid-Pliocene conditions. Therefore, you can not say aerosol forcing was the dominant driver in mid-Pliocene, because the forcing was not real. Secondly, you may need more experiments to compare individual components. For example, an experiment with only aerosol change but keeping CO<sub>2</sub> in a pre-industrial level, an experiment without aerosol-cloud interaction, etc. You can refer to the experiments in Feng et al. (2019) and Sagoo and Storelvmo (2017).

30 We appreciate that the aerosol forcing that we investigated are idealised, and therefore cannot hope to quantify the amount of uncertainty in Pliocene aerosol. However, we have demonstrated that it is could as large that resulting from other boundary conditions, in certain variables such as tropical rainfall. We had aimed to convey aerosols can be the dominant source of uncertainty, rather than the dominant driver. It is clear from the reviewers' comments that we have not made that as clear as we could have. In a revised manuscript, we will rephrase the conclusions to draw out this distinction.

35 We are not aware of any research that aerosol forcing and the resulted climate responses are state-dependent to the first order. This means that comparing Plio\_Pristine with Plio\_Polluted should yield the same results to comparing PI\_Pristine and PI\_Polluted (which we found during our initial investigations). For the latter, an experiment without ACI would be CCSM4 experiments with Plio-Pristine and Plio-Polluted. However, we don't have the computing resource to run those simulations. We want to point out that the direct aerosol forcing without ACI is very small (Myhre et al., 2013). Having those simulations would not change our results and conclusion.

Specific comments

P1, L4: 'is' -> 'it'

**Will be fixed.**

45

P2, L51-53: "mPWP simulations now use modern-day or pre-industrial aerosol concentration that may differ from the conditions during the mPWP. It implies that aerosol effects may be one of the possible explanation for the mismatch between reconstructions and simulations." The logic is not obvious here between two sentences. Please clarify it or add references.

50 **The existed data-model mismatch during the mPWP implies that the mPWP simulations haven't been able to include all the mechanisms nor to use realistic prescribed inputs. The highlight sentences were trying to point out that the mPWP simulations might be improved if use more realistic aerosol, as the simulations usually use prescribed aerosol concentration same as the pre-industrial control run. We will rewrite it to "The discrepancy between mPWP simulations and reconstructions (Haywood et al., 2013, 2020) implies that models might miss some important mechanisms (Fedorov et al., 2013) or prescribed forcing could be a source of uncertainty (Feng et al., 2019). The mPWP simulations now use modern-day or pre-industrial aerosol concentration same as the control runs that may differ from the conditions during mPWP. Lack of including the effect of aerosol forcings and the usage of unrealistic prescribed aerosol concentration in mPWP simulations implies that aerosol effects may be one of the possible explanation for the mismatch between reconstructions and simulations."**

60 P3, L62-63: "This increases the shortwave cloud radiative forcing, thus, cools surface temperature and amplifies polar warmth (Sagoo and Storelvmo, 2017)." Please check the reference, I think if you have cooling effect on the surface, the polar amplification means the amplified polar cooling.

65 Yes, you are right. Simulations of Sagoo and Storelvmo (2017) suggest high dust result in surface temperature cooling and polar amplification (from their high dust and LGM simulations) and low dust result in surface temperature warming and polar amplification (from their low dust and mPWP simulations. We will rewrite this part to only use the result of their fully coupled low dust simulations (a low dust run and a mPWP run modified by low dust). "Results showed that increased dust reduces the size of ice crystals in clouds while increasing their amount. This increases the shortwave cloud radiative forcing, thus, cools surface temperature and amplifies polar warmth (Sagoo and Storelvmo, 2017)." will be revised to "Their mPWP simulation modified by extreme low dust suggests surface temperature warming and polar amplification due to reduced radiative forcing by increased size while decreased amount of ice crystals in clouds."

70

P3, L69-70: "potential analogue nature of Pliocene climate, not to the present-day polluted climate, but to future climate scenarios which feature removal of anthropogenic pollutants" Which future scenario do you refer to here? Please specify it.

75 Most scenarios for future projections in the IPCC AR6 have a decrease in the anthropogenic aerosol forcing, which will contribute to a increase in global mean annual surface temperature and precipitation (Lee et al., 2021). We will add a reference in text.

P3, L77: Write the full name of CCSM4.

80 We will add it's full name the Community Climate System Model version 4 (CCSM4, Gent et al., 2011) in text.

P3, L79-82: "which uses Aiken, accumulation and coarse modes to solve number and size concentration of internal condensation and coagulation of different species among modes." What are "size concentration", "internal condensation"? This sentence is not clear and needs to be rephrased.

85 That should be size and number concentration instead. MAM3 solves for sizes and number concentrations of internal mixtures of dust, sea-salt, sulfate, organics and black carbon using three categorical size bins of 0.02–0.08  $\mu\text{m}$  (Aiken mode), 0.08–1  $\mu\text{m}$  (Accumulation mode) and 1.0 – 10  $\mu\text{m}$  (Coarse mode). We will rewrite the sentence to "which uses Aiken (0.02–0.08  $\mu\text{m}$ ), accumulation (0.08–1  $\mu\text{m}$ ) and coarse (1.0–10  $\mu\text{m}$ ) modes to solve size and number concentration of internal condensation and coagulation of different species among modes."

90 P3, L87: Please list key configurations or parameters in CCSM4-PlioMIP1 simulation related to this work.

The CCSM4-PlioMIP1 simulation was generated by CCSM4, an earlier version of CESM. Key improvements between the two generations have been described Meehl et al. (2013) in as well as in Sect. 2.1. Prescribed mPWP boundary condition should have no effect on simulations, as the CCSM4-PlioMIP1, Plio\_Pristine and Plio\_Polluted all used PlioMIP1 boundary condition (Haywood et al., 2010; Dowsett, 2007). Plio\_Pristine and Plio\_Polluted were branched from the CCSM4-PlioMIP1 simulation, because it would save time and computing cost of letting model reach its equilibrium state. CESM would only need to response to change in aerosol forcing. Therefore, we feel there is no need to list

95

## key configurations or parameters of CCSM4-PlioMIP1 simulation.

P3, L87: Does 'direct effect' mean 'aerosol direct effect'? Please clarify it.

100 **Yes. "aerosol" will be added.**

P3, Sec. 2.2: Are the experiments the same as the ones in Feng et al. (2019)? From the text in P3, L66-67, it seems that the simulations are the same. If they are the same, did you directly use the output data from their experiments or you rerun the experiments? Please specify it clearly in the text.

105 **Yes, simulations are the same, which is mentioned in Line 66-67 "The simulations were performed initially to analyse ..." We will rewrite the sentences to "In this study, we analyse two Pliocene simulations that were performed initially to analyse the effects of aerosol-cloud interactions on mPWP seasonally sea ice-free Arctic (Feng et al., 2019) to further investigate the potential effect of aerosol on mPWP climate. Different aerosol scenarios were applied, one with pre-industrial aerosol concentrations and one with present-day aerosol concentrations published in Lamarque et al. (2010)." We will also emphasise it again in Sect. 2.2 by adding "The existed simulations (Feng et al., 2019)..." at the beginning.**

P4, L90-92: "The other prescribed pre-industrial emissions plus industrial pollutants of anthropogenic SO<sub>2</sub>, sulfate and organic compounds estimated for the 2000s from an gridded (0.5° x 0.5°) emission dataset (hereafter referred as to Plio\_Polluted) published in Lamarque et al. (2010)." The description of the configurations of emissions are not clear. For example: (1) Does  
115 "industrial pollutants of anthropogenic SO<sub>2</sub>" mean the SO<sub>2</sub> emissions from industry sector, excluding all the emissions from other sources like vehicle emissions? (2) Are other anthropogenic emissions included here, like NO<sub>x</sub>, black carbon? (3) Here SO<sub>2</sub> could be the precursor of aerosols, and sulfate and organic compounds can be directly emitted or formed from precursors, please provide more details of your emission configurations.

**Lamarque et al. (2010) published a dataset of historical (1850-2000) anthropogenic (defined as originating from  
120 industrial, domestic and agriculture activity sectors) and biomass burning emissions of reactive gases and aerosols. The dataset provided consistent gridded emissions for CMIP5 models to run chemistry model simulations that contributed to the assessment in IPCC AR5. The emissions for year 2000 of the dataset, which prescribed in Plio\_Polluted, serve as an anchor point for historical emissions and future emissions Lamarque et al. (2010). (1) "industrial" is relative to "pre-industrial" ahead, which refers to time instead of a source. (2) No, NO<sub>x</sub> and black carbon were excluded.  
125 Emissions were constant in the Plio\_Pristine and Plio\_Polluted. (3) Lamarque et al. (2010) is an emission dataset, i.e. from primary source. Secondary sources are not included. Emitting configuration is well documented in Lamarque et al. (2010) as cited in text. We will add a bit more to introduce the dataset by "... published in Lamarque et al. (2010). The emission dataset provided consistent gridded anthropogenic (defined as originating from industrial, domestic and agriculture activity sectors) and biomass burning of reactive gases and aerosols covering the historical period from  
130 1850 to 2000 CMIP5 models to use in running chemistry model simulations that would contributed to the assessment in**

**IPCC AR5 (Lamarque et al., 2010)."**

P4, L110: "PI" is used before defined. And please also specify what PI simulation represents, e.g., an average over a period from a specific CMIP5/6 simulation experiment?

135 **PI will be defined here. In modelling, PI usually refers to the pre-industrial control run, which applies pre-industrial (1850 CE) boundary condition and performs as a baseline for computing anomaly. In this study, PI refers to a simulation run by CESM model with pre-industrial boundary condition prescribed. We think there is no need to specify it in text.**

P5, L122-123: "The combination regenerates the site sets 35, 72; 22, 77; 79,61; 58,61,79,101 and 65, 66 into new sites located at the center of sets." Where do the numbers come from? Please clarify it.

140 **Site numbers come from the the compilation of mPWP proxy records of Feng et al. (2022). We will add its source in text, as "The combination regenerates the site sets 35, 72; 22, 77; 79,61; 58,61,79,101 and 65, 66 of Feng et al. (2022) into new sites located at the center of sets."**

145 P5, L131-133: "The underestimation in Northern Hemisphere warming may be explained by that Plio\_Pristine was branched from an earlier CCSM4-PlioMIP1 simulation that had underestimated the warming in the Northern Hemisphere (Rosenbloom et al., 2013)." What about the results from the latest simulations in PlioMIP2? It would be better to also compare your results with the newer experiment results.

150 **First of all, the simulations used PlioMIP1 boundary conditions. Secondly, though PlioMIP2 simulations produce warmer and wetter mPWP than PlioMIP1, the difference is caused by the addition of new and more sensitive models instead of the modifications in boundary conditions between the two PlioMIPs (Haywood et al., 2020). CESM's earlier version CCSM4 participated in both PlioMIPs and show that PlioMIP2 anomalies are similar to PlioMIP1's (Haywood et al., 2020). Therefore, it would be appropriate to compare with the PlioMIP1 outputs here. Comparison with the PlioMIP2 results would not be necessary.**

155

P5, L134-135: "13 out of the 37 sites show a mismatch between simulated surface temperature anomaly and reconstructed SST anomaly smaller than 1.0°C." Please also add the reference here besides in the figure caption.

**Foley and Dowsett (2019) will be added.**

160 P5, L138-139: "The reconstructed zonal temperature gradient along the tropical Pacific Ocean is around 0.5°C greater than simulations (Plio\_Pristine - PI)" How do you define the zonal gradient here, is it the temperature difference between two regions? How the regions are defined?

**The reconstructed temperature gradient is calculated as the temperature difference between sites near Colombia and sites near SE Asia. We will give the regions and change "zonal" to "meridional" for being easier to understand.**

165 P5, L147-148: "Precipitation decreases over subtropical oceans, eastern parts of South America and monsoon areas over

North America." The proxy data in Fig. 1b show enhanced precipitation almost the whole globe, with only few sites showing reduced precipitation, which indicates a global scale of the precipitation increasing and a regional/local scale of the decreasing. However, the simulation results show reduced precipitation over a large area, especially the Atlantic Ocean. Could you explain the reason, or could you find any references which mentioned it or tried to explain it?

170 **The spatial pattern of the increased precipitation over low and high latitudes and the reduction over part of the parts of the subtropics in Fig.1b is consistent with the PliMIPs results (Haywood et al., 2013, 2020). In the mPWP simulations, precipitation occurs more in the tropics than the subtropics by having a weakened Hadley circulation that is related to decreased zonal temperature gradient between the tropics and the subtropics (Corvec and Fletcher, 2017). Models also produce a poleward shift in mid-latitude westerlies during the mPWP, which is linked to reduced merid-**  
175 **ional temperature gradient (Li et al., 2015). The poleward shift in mid-latitude westerlies results in a poleward shift in higher-latitude precipitation. The precipitation over subtropics, thus, shows a reduction in the mPWP simulations.**

P6, L155: "Reducing atmospheric aerosols is expected to warm the climate." It needs more details and references.

**Aerosols that mainly scatter solar radiation have a cooling effect, and those absorb solar radiation have a cooling effect. Scattering and absorbing aerosols mix in the atmosphere. Net effect of aerosols on energy budget is dependent**  
180 **on the characteristics of surface and cloud. According to IPCC AR6, human-induced aerosols contributed to a cooling of 0.0°C to 0.8°C between 2010-2019 relative to 1850-1900 (IPCC, 2021). Therefore, removing anthropogenic aerosols is expected to warm the climate. We will add the later sentence (According to IPCC AR6 ... (IPCC, 2021).) in text.**

P6, L169-171: I do not understand the logic of these two sentences, please clarify it.

185 **We are trying to say that removing aerosols only causes more over Northeastern Pacific and high-latitude North Atlantic Ocean than the mPWP boundaries. We will rewrite the sentence to "However, the mPWP boundary conditions causes more warming than removing anthropogenic aerosols nearly global except Northeastern Pacific and high-latitude North Atlantic Ocean (Fig. 5a,c,e). More warming lead by the mPWP boundaries than removal of aerosols suggests ..." to emphasise that the mPWP boundaries lead to more warming than removal of aerosols.**

190

P6, L176: Why do you think ITCZ is narrower in your simulation Plio\_Pristine compared to Plio\_Polluted? Please clarify it.  
**We will discussion on change in Hadley Circulation.**

P6, L183-184: "consistent with the positive correlation between tropical precipitation change and spatial deviations of SST  
195 warming from the tropical mean (Xie et al., 2010)" Then what is the reason of decreasing precipitation over the warming SST areas in Fig. 5?

**We focus on annual change here, which shows an overall enhancement along the tropics that is largely affected by the strong increase during JJA. If you mean the decreasing precipitation over the tropics during DJF, a possible explanation is due to the change in low-latitude easterlies (Fig.9d), as the low-latitude easterlies is strengthened between 30°N(S)**

200 **and roughly 10°N(S) while is weakened between 10°N(S) over the tropical Pacific.**

P7, Sec. 4.1: The discussion in this section about interaction of aerosol and cloud is not clear. (1) It is better to first give the definitions of net shortwave/longwave flux, clear-sky/full-sky net shortwave/longwave flux, shortwave/longwave cloud forcing, and also how you estimate the aerosol direct effects from these variables. In Fig. 3, the aerosol direct effect is not shown, so  
205 you need to clarify it.

**Fig.3a plots change in net shortwave and longwave flux at top of model under full-sky and clear-sky condition, respectively. At top of model can be viewed as at top of the atmosphere (TOA). Net shortwave/longwave flux are TOA shortwave absorption and longwave emission. clear-sky/full-sky defines the cloud status, i.e. full-sky means cloudy sky and clear-sky refers to no clouds. For example, clear-sky net shortwave flux means TOA shortwave absorption with no  
210 clouds in the atmosphere. Clear-sky variables show aerosol direct effect. Difference between net full-sky (cloudy sky) and clear-sky (no clouds) flux would show aerosol indirect effect, which can be understood as cloud forcing. Shortwave cloud forcing is measured by difference in surface downwelling shortwave radiation between clear-sky condition and the full condition, while longwave forcing is the difference in TOA upwelling longwave radiation.**

215 (2) "while clouds contribute to a net forcing greater than 2 W m<sup>-2</sup> with more shortwave absorption and less longwave emission" Which latitudes do you mean here? In this phrase "more shortwave absorption and less longwave emission", do you mean on the surface or in the cloud level?

**Sect. 4.1 focuses on tropical precipitation change. The "2 W m<sup>-2</sup>" comes from tropical average (23.5°N to 23.5°S), which can be seen in Fig.3b. "more shortwave absorption and less longwave emission" refers to net forcing change  
220 induced by clouds, which are surface shortwave cloud forcing and and TOA longwave cloud forcing.**

(3) "is still less important than the change in shortwave cloud forcing." How can you find this from Figs. 3 and 4?

**Aerosol affect energy flux through direct effect by reflection or indirect effect through interaction with clouds. Difference  
225 between net full-sky (cloudy sky) and clear-sky (no clouds) flux would show aerosol indirect effect. Shortwave cloud forcing is measured by subtracting surface downwelling shortwave radiation of clear-sky condition from the full condition. The difference patterns (not shown in figures directly) match the change in cloud forcing, which shows that aerosol indirect effect is more important here.**

(4) "Figure 6 shows decrease in droplet concentration (especially over lands and high latitudes, Fig. A3a) and decrease in  
230 cloud liquid path (except tropical Pacific between 5°S and 5°N and western Africa, Fig. A3b) after the removal of pollutants." How could you conclude this from Fig. 6?

**We do apologise. There was extra panels about annual averaged change in droplet concentration and cloud liquid path in our old Fig.6. We feel Fig A3 would be sufficient, so we removed these panels before submission. We will rewrite this sentence to "Removal of pollutants decreases droplet concentration (especially over lands and high latitudes, Fig.**

235 **A3a) and decrease cloud liquid path (except tropical Pacific between 5°S and 5°N and western Africa, Fig. A3b)."**

(5) The title of this section is "Key forcing driving tropical precipitation change", but there is no discussion about how the forcings are driving tropical precipitation change. Please add more discussion details.

240 **Analysis in Sect. 3 shows that tropical precipitation enhancement after the removal of anthropogenic emissions is due to the further warming by removing aerosol-induced cooling from the atmosphere. The aim of this section is finding out which aerosol effect (direct/indirect) is more important. The first half discussion shows that aerosol radiation forcing is less important than cloud forcing, i.e. aerosol indirect effect is more important. The second half shows that removing anthropogenic emissions affects cloud forcing by reducing cloud albedo and decreasing cloud lifetime.**

245 P8, L225-228: "Figure 10 shows the relative importance of removing anthropogenic aerosols and mPWP boundary conditions on mPWP zonal mean precipitation change. The ratio (panel a) indicates that the relative importance of effects of aerosol forcing and mPWP boundary conditions (including high CO<sub>2</sub>) on precipitation is complicated, but overall aerosol effect is more important over the tropics (panel b), which could imply the importance of aerosol scenario in simulating Pliocene climate." (1) Fig. 10a is difficult to see the features, please find a better way to plot the data, maybe increase the width-height ratio?  
250

**We will replot Fig.10**

(2) Please add more detailed discussion about the relative importance instead of just one word "complicated".

255 **"complicated" comes from the the ratio of change in latitudinal averaged annual, JJA and DJF precipitation change shown in Fig.10a whose patterns are complex. We are trying to detect which (aerosol forcing or mPWP boundary condition) is more important but not why. Overall, Plio\_Pristine - Plio\_Polluted shows greater change in tropical zonal averaged annual mean precipitation than Plio\_Pristine - PI, as shown in Fig. 1 below.**

(3) It is difficult to see "aerosol effect is more important over the tropics" from Fig. 10b, maybe a global map of the ratio is better to represent it?  
260

**Before hand, we apologise that we made a mistake in caption, as dark markers actually show latitudinal-averaged change within the tropics and the light colors for those outside of tropics. We'll replot Fig. 10.**

(4) In Figs. 9 and 10 you mentioned the seasonal values and annual values, but you have never discussed any details related to seasonal change. Please add more discussion about it.  
265

**Our analysis is focusing on annual change. The reason of giving seasonal change is to show if the annual change is largely affected by seasonal variance.**



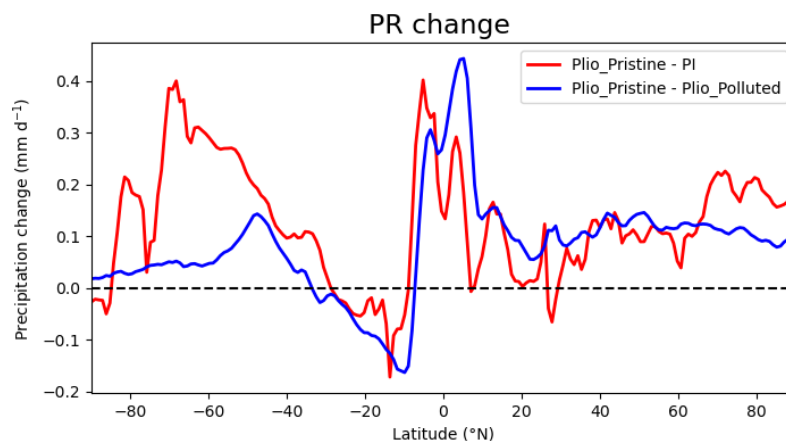

**Figure 1. Latitude-averaged annual mean precipitation change between experiments.**

P8, L241-242: "SO<sub>2</sub> increased by 11 Tg in Unger and Yue (2014) mPWP simulations, yet SO<sub>2</sub> from anthropogenic sources is  
 270 estimated to be 120 Tg from 1980 to 2000s (Smith et al., 2011)." Here 11 Tg should be 11 Tg/yr, which is the emission rate,  
 the same for 120 Tg/yr.

**We will correct the unit.**

P8, L42-43: "As such, despite that enhanced biogenic emissions may compensate some of the responses seen in the  
 275 Plio\_Pristine" For "compensate", do you mean: "If the enhanced biogenic emissions, which will increase the secondary or-  
 ganic aerosol formation and growth, is included in the Plio\_Pristine simulation, the difference between Plio\_Pristine and PI  
 will decrease."? The statement here is not clear, please clarify it.

**Sect. 4.3 is for implications for simulating Pliocene climate, not only focusing on the results of this study. According  
 to sentences before Line242-243, though mPWP was expected to have stronger biogenic emissions from more active  
 280 wildfire and biome productions, the mPWP emission is likely much smaller than the anthropogenic emission during the  
 historical period (1850CE onwards till now) and near future. "compensate" here means the reduced difference between  
 mPWP and near future climate. Because the compensation is small, we make an argument in the following half sentence  
 as "we argue that the absence of anthropogenic pollutant from the mPWP troposphere remains one of the important  
 factors driving the differences between the mPWP and near future climate, especially the Arctic climate (Feng et al.,  
 285 2019) and hydroclimate."**

P8, L246-247: "Sagoo and Storelvmo (2017) looked in to the effect of dust and demonstrated that increased dust emissions  
 resulted in an enhanced dynamical response that lead to great changes in hydrological circulations." The dust emission in  
 mPWP is lower compared to pre-industrial, why you are talking about "increased dust emissions"?

290 **This sentence is about Sagoo and Storelvmo (2017)'s major finding based on their high-dust simulations, rather than their mPWP simulation. Their mPWP simulation used low-dust scenario. We will remove this sentence from text, and only include the finding of the mPWP simulation.**

P8, L247-249: "Their Pliocene simulation with idealised dust scenario shows greater change in precipitation than only  
295 consider CO2 forcing, yet only used idealized scenario (Sagoo and Storelvmo, 2017)." Please add more details, e.g., which scenario, how large is the "greater change in precipitation", global or tropical precipitation.

**We will rewrite the sentence to "Their Pliocene simulation with idealised extreme low dust scenario shows greater change in precipitation than only consider CO2 forcing, yet only used idealized scenario (Sagoo and Storelvmo, 2017)".**

300 P9, L251-252: Please add at least some simplified definition of the moisture budget component terms.

**We will add definitions here.**

P9, L254-255: The statement from "high CO2 concentration" to "thermodynamic change plays an important role" is not explicitly clear here, please add more detailed discussion if you want to keep this statement.

305 **L251-258 discussed which decomposed component of the anomalous moisture budget majorly drives the monsoon change in simulations forced by high-CO2 concentration. The decomposed components include thermodynamic component, dynamic component, residual component and net energy input component. We will revise the text to make it clear.**

310 P9, L255-257: Removal of anthropogenic emissions will also affect the thermodynamics itself in the atmosphere, and the anthropogenic emissions include both scattering (e.g., sulfate) and absorbing (e.g., black carbon) compositions, which are also related to shortwave and longwave radiation, so this process is complicated. Therefore, I do not think it "would logically increase the effects of thermodynamic and net energy input". Please add more discussion and references here.

315 **We agree that the process is complicated. However, black carbon is not included in our simulations. And as mentioned above, "thermodynamic and net energy input" here are the decomposed component of the anomalous moisture budget driving monsoon change.**

Figs. 6 and 8: Change between which cases? Please specify it in the figure caption.

**We will add "Plio\_Pristine - Plio\_Polluted" in captions to clarify the difference plotted in figures.**

320

References Feng, R., Otto-Bliesner, B. L., Xu, Y., Brady, E., Fletcher, T., & Ballantyne, A. (2019). Contributions of aerosol-cloud interactions to mid-Piacenzian seasonally sea ice-free Arctic Ocean. *Geophysical Research Letters*, 46, 9920–9929. <https://doi.org/10.1029/2019GL083960>. Haywood, A. M., Dowsett, H. J., Robinson, M. M., Stoll, D. K., Dolan, A. M., Lunt,

D. J., Otto-Bliesner, B., and Chandler, M. A.: Pliocene Model Intercomparison Project (PlioMIP): experimental design and  
325 boundary conditions (Experiment 2), *Geosci. Model Dev.*, 4, 571–577, <https://doi.org/10.5194/gmd-4-571-2011>, 2011.

Sagoo, N., and T. Storelvmo (2017), Testing the sensitivity of past climates to the indirect effects of dust, *Geophys. Res. Lett.*, 44, 5807–5817, doi:10.1002/2017GL072584.

## References

- Corvec, S. and Fletcher, C. G.: Changes to the tropical circulation in the mid-Pliocene and their implications for future climate, *Climate of the Past*, 13, 135–147, <https://doi.org/10.5194/cp-13-135-2017>, 2017.
- Dowsett, H.: Faunal re-evaluation of Mid-Pliocene conditions in the western equatorial Pacific, *Micropaleontology*, 53, 447–456, <https://doi.org/10.2113/gsmicropal.53.6.447>, 2007.
- Fedorov, A. V., Brierley, C. M., Lawrence, K. T., Liu, Z., Dekens, P. S., and Ravelo, A. C.: Patterns and mechanisms of early Pliocene warmth, *Nature*, 496, 43–49, <https://doi.org/10.1038/nature12003>, 2013.
- 335 Feng, R., Otto-Bliesner, B. L., Xu, Y., Brady, E., Fletcher, T., and Ballantyne, A.: Contributions of aerosol-cloud interactions to mid-Piacenzian seasonally sea ice-free Arctic Ocean, *Geophysical Research Letters*, 46, 9920–9929, <https://doi.org/https://doi.org/10.1029/2019GL083960>, 2019.
- Feng, R., Bhattacharya, T., Otto-Bliesner, B. L., Brady, E. C., Haywood, A. M., Tindall, J. C., Hunter, S. J., Abe-Ouchi, A., Chan, W.-L., Kageyama, M., Contoux, C., Guo, C., Li, X., Lohmann, G., Stepanek, C., Tan, N., Zhang, Q., Zhang, Z., Han, Z., Williams, C. J. R., Lunt, D. J., Dowsett, H. J., Chandan, D., and Peltier, W. R.: Past terrestrial hydroclimate sensitivity controlled by Earth system feedbacks, *Nature Communications*, 13, 1306, <https://doi.org/10.1038/s41467-022-28814-7>, 2022.
- 340 Foley, K. M. and Dowsett, H. J.: Community sourced mid-Piacenzian sea surface temperature (SST) data, US Geological Survey data release, <https://doi.org/10.5066/P9YP3DTV>, last access: 21 August 2023, 2019.
- Gent, P. R., Danabasoglu, G., Donner, L. J., Holland, M. M., Hunke, E. C., Jayne, S. R., Lawrence, D. M., Neale, R. B., Rasch, P. J., Vertenstein, M., Worley, P. H., Yang, Z.-L., and Zhang, M.: The community climate system model version 4, *Journal of Climate*, 24, 4973–4991, <https://doi.org/10.1175/2011JCLI4083.1>, 2011.
- 345 Haywood, A. M., Dowsett, H. J., Otto-Bliesner, B., Chandler, M. A., Dolan, A. M., Hill, D. J., Lunt, D. J., Robinson, M. M., Rosenbloom, N., Salzmann, U., and Sohl, L. E.: Pliocene Model Intercomparison Project (PlioMIP): experimental design and boundary conditions (Experiment 1), *Geoscientific Model Development*, 3, 227–242, <https://doi.org/10.5194/gmd-3-227-2010>, 2010.
- 350 Haywood, A. M., Hill, D. J., Dolan, A. M., Otto-Bliesner, B. L., Bragg, F., Chan, W.-L., Chandler, M. A., Contoux, C., Dowsett, H. J., Jost, A., Kamae, Y., Lohmann, G., Lunt, D. J., Abe-Ouchi, A., Pickering, S. J., Ramstein, G., Rosenbloom, N. A., Salzmann, U., Sohl, L., Stepanek, C., Ueda, H., Yan, Q., and Zhang, Z.: Large-scale features of Pliocene climate: results from the Pliocene Model Intercomparison Project, *Climate of the Past*, 9, 191–209, <https://doi.org/10.5194/cp-9-191-2013>, 2013.
- Haywood, A. M., Tindall, J. C., Dowsett, H. J., Dolan, A. M., Foley, K. M., Hunter, S. J., Hill, D. J., Chan, W.-L., Abe-Ouchi, A., Stepanek, C., Lohmann, G., Chandan, D., Peltier, W. R., Tan, N., Contoux, C., Ramstein, G., Li, X., Zhang, Z., Guo, C., Nisancioglu, K. H., Zhang, Q., Li, Q., Kamae, Y., Chandler, M. A., Sohl, L. E., Otto-Bliesner, B. L., Feng, R., Brady, E. C., von der Heydt, A. S., Baatsen, M. L. J., and Lunt, D. J.: The Pliocene Model Intercomparison Project Phase 2: large-scale climate features and climate sensitivity, *Climate of the Past*, 16, 2095–2123, <https://doi.org/10.5194/cp-16-2095-2020>, 2020.
- 355 IPCC: Summary for Policymakers, in: *Climate Change 2021: The Physical Science Basis. Contribution of Working Group I to the Sixth Assessment Report of the Intergovernmental Panel on Climate Change*, edited by Masson-Delmotte, V., Zhai, P., Pirani, A., Connors, S. L., Péan, C., Berger, S., Caud, N., Chen, Y., Goldfarb, L., Gomis, M. I., Huang, M., Leitzell, K., Lonnoy, E., Matthews, J., Maycock, T. K., Waterfield, T., Yelekçi, O., Yu, R., , and Zhou, B., Cambridge University Press, Cambridge, United Kingdom and New York, U.S.A., 2021.

- Lamarque, J. F., Bond, T. C., Eyring, V., Granier, C., Heil, A., Klimont, Z., Lee, D., Liou, S. C., Mieville, A., Owen, B., Schultz, M. G.,  
365 Shindell, D., Smith, S. J., Stehfest, E., Van Aardenne, J., Cooper, O. R., Kainuma, M., Mahowald, N., McConnell, J. R., Naik, V., Riahi,  
K., and Van Vuuren, D. P.: Historical (1850–2000) gridded anthropogenic and biomass burning emissions of reactive gases and aerosols:  
Methodology and application, *Atmospheric Chemistry and Physics*, 10, 7017–7039, <https://doi.org/10.5194/acp-10-7017-2010>, 2010.
- Lee, J. Y., Marotzke, J., Bala, G., Cao, L., Corti, S., Dunne, J., Engelbrecht, F., Fischer, E., Fyfe, J., Jones, C., Maycock, A., Mutemi,  
J., Ndiaye, O., Panickal, S., and Zhou, T.: Future Global Climate: Scenario-Based Projections and Near-Term Information., in: *Climate*  
370 *Change 2021: The Physical Science Basis. Contribution of Working Group I to the Sixth Assessment Report of the Intergovernmental*  
*Panel on Climate Change*, edited by Masson-Delmotte, V., Zhai, P., Pirani, A., Connors, S. L., Péan, C., Berger, S., Caud, N., Chen, Y.,  
Goldfarb, L., Gomis, M. I., Huang, M., Leitzell, K., Lonnoy, E., Matthews, J., Maycock, T. K., Waterfield, T., Yelekçi, O., Yu, R., , and  
Zhou, B., Cambridge University Press, 2021.
- Li, X., Jiang, D., Zhang, Z., Zhang, R., Tian, Z., and Yan, Q.: Mid-Pliocene westerlies from PlioMIP simulations, *Advances in Atmospheric*  
375 *Sciences*, 32, 909–923, <https://doi.org/10.1007/s00376-014-4171-7>, 2015.
- Meehl, G. A., Washington, W. M., Arblaster, J. M., Hu, A., Teng, H., Kay, J. E., Gettelman, A., Lawrence, D. M., Sanderson,  
B. M., and Strand, W. G.: Climate change projections in CESM1(CAM5) compared to CCSM4, *Journal of Climate*, 26, 6287–6308,  
<https://doi.org/10.1175/JCLI-D-12-00572.1>, 2013.
- Myhre, G., Samset, B. H., Schulz, M., Balkanski, Y., Bauer, S., Bernsten, T. K., Bian, H., Bellouin, N., Chin, M., Diehl, T., Easter, R. C.,  
380 Feichter, J., Ghan, S. J., Hauglustaine, D., Iversen, T., Kinne, S., Kirkevåg, A., Lamarque, J.-F., Lin, G., Liu, X., Lund, M. T., Luo, G.,  
Ma, X., van Noije, T., Penner, J. E., Rasch, P. J., Ruiz, A., Seland, Ø., Skeie, R. B., Stier, P., Takemura, T., Tsigaridis, K., Wang, P., Wang,  
Z., Xu, L., Yu, H., Yu, F., Yoon, J.-H., Zhang, K., Zhang, H., and Zhou, C.: Radiative forcing of the direct aerosol effect from AeroCom  
Phase II simulations, *Atmospheric Chemistry and Physics*, 13, 1853–1877, <https://doi.org/10.5194/acp-13-1853-2013>, 2013.
- Sagoo, N. and Storelvmo, T.: Testing the sensitivity of past climates to the indirect effects of dust, *Geophysical Research Letters*, 44, 5807–  
385 5817, <https://doi.org/10.1002/2017GL072584>, 2017.
